# Supplementary material for: Pd(II)-Imprinted Chitosan Adsorbent for Selective Adsorption of Pd(II): Optimizing the Imprinting Process through Box–Behnken Experimental Design
Source: PubMed Central journal article supplement — ACS Omega. 2021 May 12;6(20):13057–65. doi: 10.1021/acsomega.1c00685 (PMC8158805; doi:10.1021/acsomega.1c00685), 2021-05-12
Supplement: ao1c00685_si_001.pdf [file ao1c00685_si_001.pdf]

*Supporting Information*

**Pd(II)-imprinted chitosan adsorbent for selective adsorption of Pd(II): Optimizing the imprinting process through Box-Behnken experimental design**

Shuo Lin<sup>1,2</sup>, Wei Wei<sup>1,3</sup>, Xiaoyu Lin<sup>1</sup>, John Kwame Bediako<sup>1</sup>, D. Harikishore Kumar Reddy<sup>1</sup>, Myung-Hee Song<sup>1,\*</sup>, Yeoung-Sang Yun<sup>1,\*</sup>

<sup>1</sup> *School of Chemical Engineering, Jeonbuk National University, Jeonbuk 54896, Republic of Korea*

<sup>2</sup> *Department of Chemistry, University of Calgary, Calgary, Alberta T2N 1N4, Canada*

<sup>3</sup> *Key Laboratory for Synergistic Prevention of Water and Soil Environmental Pollution, Xinyang Normal University, Xinyang, Henan 464000, China*

**\*Corresponding Authors:**

*Tel.: +82-63-270-2308; Fax: +82-63-270-2306;*

*E-mail addresses: bsbsmh@gmail.com (M.-H. Song), ysyun@jbnu.ac.kr (Y.-S. Yun).*

**Table S1.** Sequential model fitting results.

| <b>Sequential model sum of squares</b> |                |                |                         |                          |                    |                  |
|----------------------------------------|----------------|----------------|-------------------------|--------------------------|--------------------|------------------|
| Source                                 | Sum of squares | df             | Mean square             | F-value                  | Prob > F           | comment          |
| Mean vs Total                          | 25883.53       | 1              | 25883.53                |                          |                    |                  |
| Linear vs Mean                         | 8453.15        | 3              | 2817.72                 | 15.69                    | 0.0001             |                  |
| 2FI vs Linear                          | 616.53         | 3              | 205.51                  | 1.20                     | 0.3603             |                  |
| <u>Quadratic vs 2FI</u>                | <u>1683.82</u> | <u>3</u>       | <u>561.27</u>           | <u>116.07</u>            | <u>&lt; 0.0001</u> | <u>Suggested</u> |
| Cubic vs Quadratic                     | 25.64          | 3              | 8.55                    | 4.16                     | 0.1010             | Aliased          |
| Residual                               | 8.21           | 4              | 2.05                    |                          |                    |                  |
| Total                                  | 36670.88       | 17             | 2157.11                 |                          |                    |                  |
| <b>Lack of fit tests</b>               |                |                |                         |                          |                    |                  |
| Source                                 | Sum of squares | df             | Mean square             | F-value                  | Prob > F           |                  |
| Linear                                 | 2325.99        | 9              | 258.44                  | 125.87                   | 0.0002             |                  |
| 2FI                                    | 1709.46        | 6              | 284.91                  | 138.76                   | 0.0001             |                  |
| <u>Quadratic</u>                       | <u>25.64</u>   | <u>3</u>       | <u>8.55</u>             | <u>4.16</u>              | <u>0.1010</u>      | <u>Suggested</u> |
| Cubic                                  | 0.00           | 0              |                         |                          |                    | Aliased          |
| Pure Error                             | 8.21           | 4              | 2.05327                 |                          |                    |                  |
| <b>Model summary statistics</b>        |                |                |                         |                          |                    |                  |
| Source                                 | Std. dev.      | R <sup>2</sup> | Adjusted R <sup>2</sup> | Predicted R <sup>2</sup> | PRESS              |                  |
| Linear                                 | 13.40          | 0.7836         | 0.7337                  | 0.6117                   | 4188.22            |                  |
| 2FI                                    | 13.11          | 0.8408         | 0.7452                  | 0.4508                   | 5923.96            |                  |
| <u>Quadratic</u>                       | <u>2.20</u>    | <u>0.9969</u>  | <u>0.9928</u>           | <u>0.9608</u>            | <u>423.00</u>      | <u>Suggested</u> |
| Cubic                                  | 1.43           | 0.9992         | 0.9970                  |                          |                    | Aliased          |

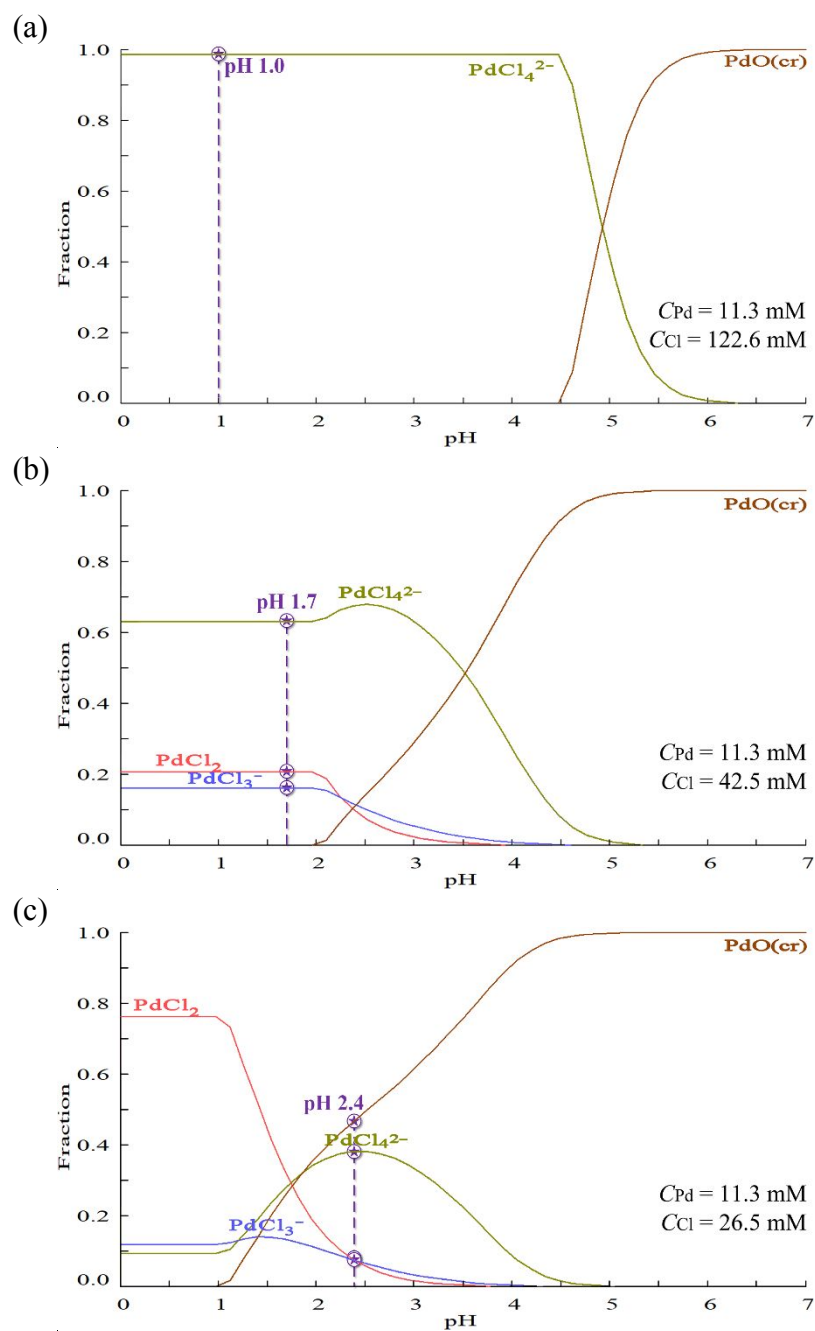

**Figure S1.** The equilibrium diagrams for  $1200 \text{ mg L}^{-1}$  Pd(II) ( $C_{Pd} = 11.3 \text{ mM}$ ) solutions with various concentration of  $Cl^-$ . The diagrams were obtained by the program of MEDUSA (Royal Institute of Technology, Sweden). ( $PdCl_2$  dissolving in diluted hydrochloric acid solutions at pH 1.0 (a), pH 1.7 (b) and pH 2.4 (c) contain 122.6 mM, 42.5 mM and 26.5 mM of  $Cl^-$ , respectively)

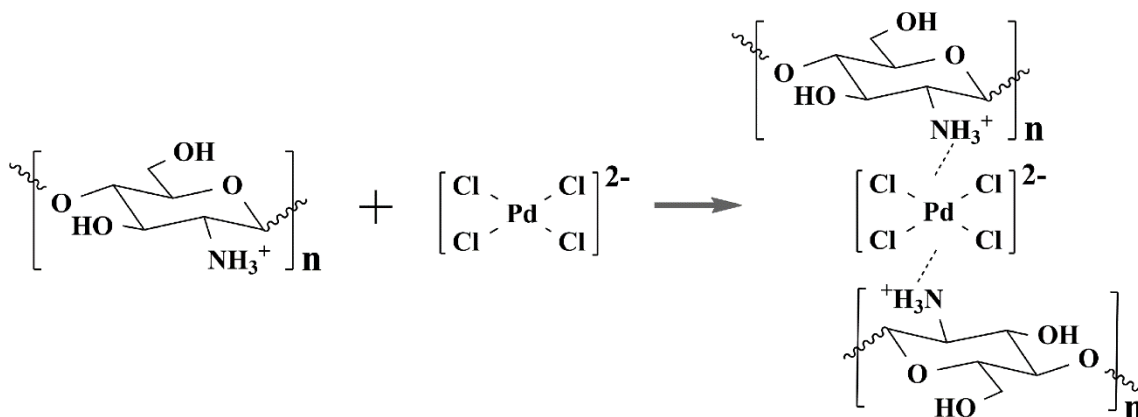

**Figure S2.** Amine groups of chitosan bind with  $\text{PdCl}_4^{2-}$ .

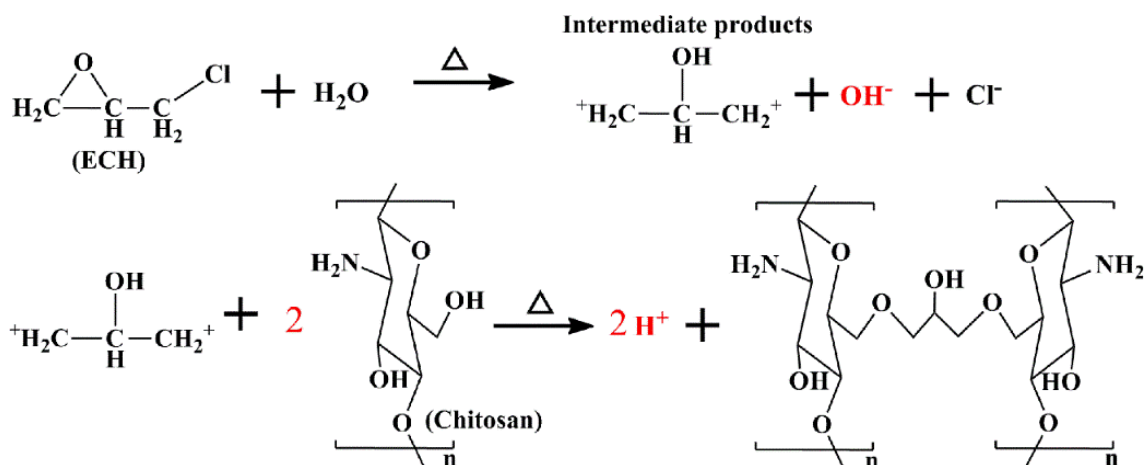

**Figure S3.** ECH crosslinking reactions with chitosan.

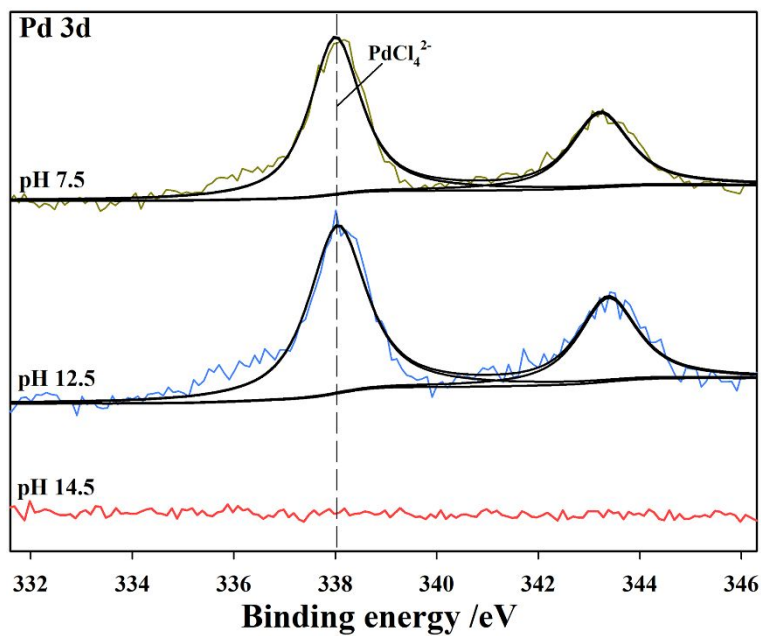

**Figure S4.** XPS Pd 3d spectra of chitosan fibers after second crosslinking in ECH solutions with pH at 7.5, 12.5 and 14.5.

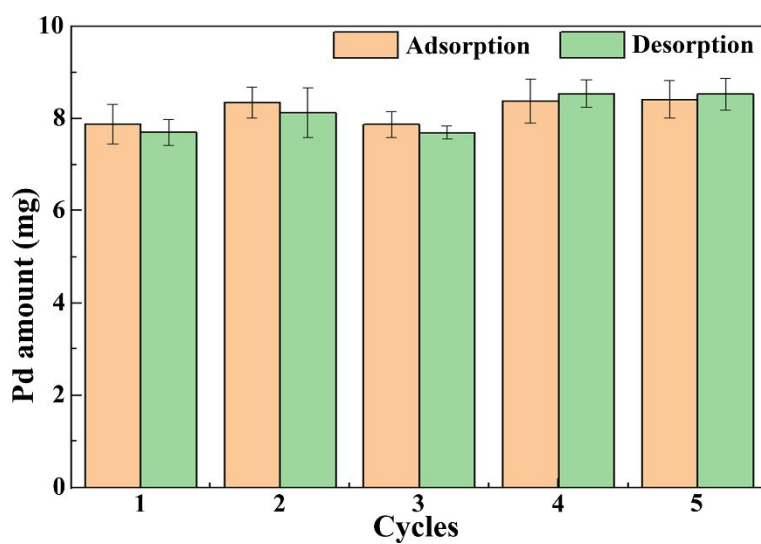

**Figure S5.** Adsorption and desorption cycles of ICA for Pd(II).
